# Supplementary material
Source: Springer Nature journal article supplement (https://www.springermedizin.de/resource/supplementary/12889_2013_6814_MOESM4_ESM.pdf/9499042)
Supplement: MOESM4 [file 9499042]

**Table 3: Prevalence of specific high-risk HPV types, among Nigerian women**

| <b>High-risk<br/>HPV Type</b> | <b>Age ≤ 36 years</b> | <b>Age &gt; 36 years</b> | <b>P-value</b> |
|-------------------------------|-----------------------|--------------------------|----------------|
|                               | <b>N (%)</b>          | <b>N (%)</b>             |                |
| <b>HPV 16</b>                 | 4 (3.0)               | 2 (1.5)                  | 0.44           |
| <b>HPV 18</b>                 | 2 (1.5)               | 5 (3.7)                  | 0.45           |
| <b>HPV 31</b>                 | 2 (1.5)               | 2 (1.5)                  | 1.0            |
| <b>HPV 33</b>                 | 5 (3.8)               | 1 (0.7)                  | 0.12           |
| <b>HPV 35</b>                 | 10 (7.5)              | 4 (2.9)                  | 0.1            |
| <b>HPV 39</b>                 | 5 (3.9)               | 2 (1.5)                  | 0.44           |
| <b>HPV 45</b>                 | 7 (5.3)               | 2 (1.5)                  | 0.1            |
| <b>HPV 51</b>                 | 4 (3.0)               | -                        | 0.05           |
| <b>HPV 52</b>                 | 6 (4.5)               | -                        | 0.01           |
| <b>HPV 56</b>                 | 8 (6.0)               | 4 (2.9)                  | 0.25           |
| <b>HPV 58</b>                 | 6 (4.5)               | 4 (2.9)                  | 0.53           |
| <b>HPV 59</b>                 | 5 (3.8)               | 4 (2.9)                  | 0.74           |
| <b>HPV 68</b>                 | 8 (6.0)               | -                        | 0.003          |
